# Supplementary material for: Neonatal Pharmacokinetics and Biodistribution of Polymeric Nanoparticles and Effect of Surfactant
Source: Pharmaceutics. 2023 Apr 7;15(4):1176. doi: 10.3390/pharmaceutics15041176 (PMC10140984; doi:10.3390/pharmaceutics15041176)
Supplement: Supplementary file 1 [file pharmaceutics-15-01176-s001.zip › pharmaceutics-2254967-supplementary.pdf]

**Neonatal pharmacokinetics and biodistribution of polymeric nanoparticles and effect of surfactant**

Nuo Xu<sup>1</sup>, Megan Wong<sup>1</sup>, Gabrielle Balistreri<sup>2</sup>, Elizabeth Nance<sup>1-4</sup>. \*

<sup>1</sup>Department of Chemical Engineering, University of Washington, Seattle WA 98195

<sup>2</sup>Molecular Engineering & Sciences Institute, University of Washington, Seattle, WA 98195, USA

<sup>3</sup>Department of Bioengineering, University of Washington, Seattle, Washington 98195

<sup>4</sup>Center for Human Development and Disability, University of Washington, Seattle, Washington, 98195

\*Corresponding author: [eanance@uw.edu](mailto:eanance@uw.edu)

## Supplemental figure

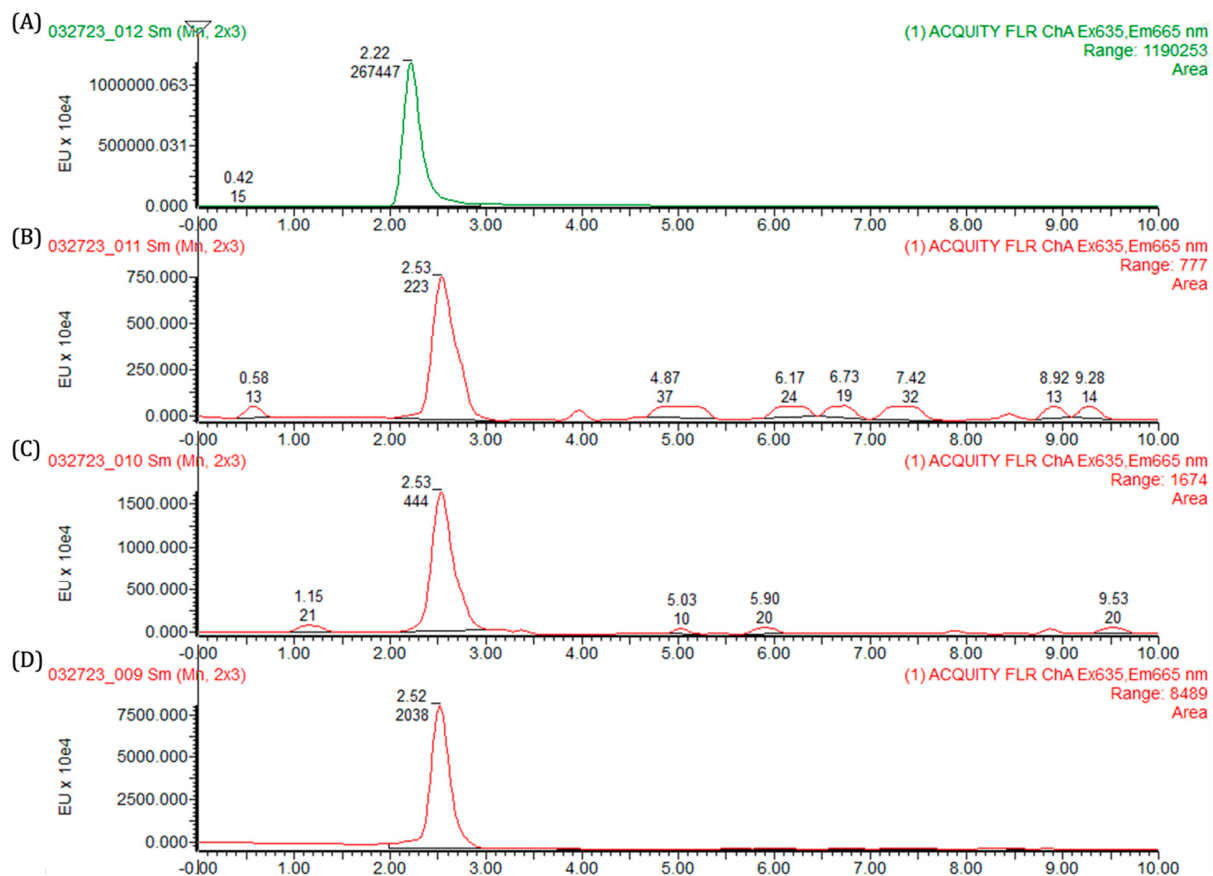

**Figure S1. Representative HPLC chromatograms acquired based on Ex/Em at 635 nm/665 nm for:** (A) Free CF647 dye at a 20 nmol/mL concentration, (B) blank serum extracts, (C) serum extracts obtained from rat 4 h post injection of PLGA-PEG/F127 at a 150 mg/kg dosage, and (D) serum extracts obtained from rat 4 h post injection of PLGA-PEG/P80 at a 150 mg/kg dosage. The retention time for the serum extracts is different than the free CF647, indicating that there was no CF647 detected in serum extracts.

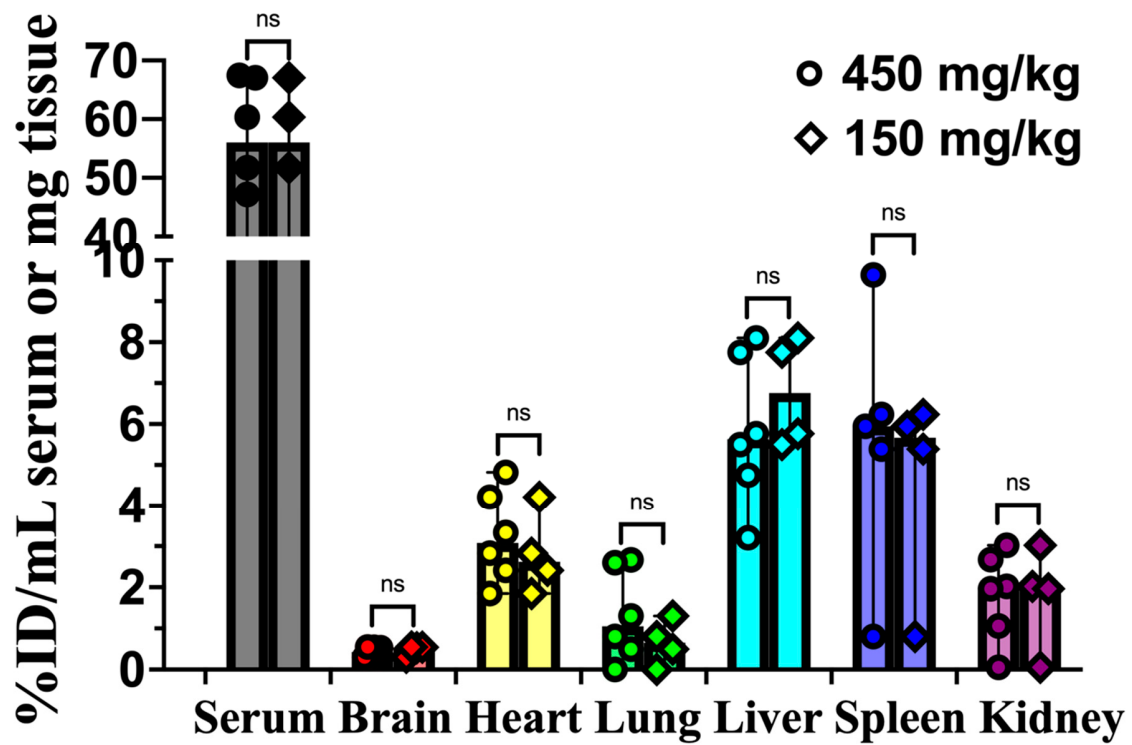

**Figure S2. Dose-dependent biodistribution of PLGA-PEG/P80.** Biodistribution of PLGA-PEG/P80 at 4 h after i.p. injection with 450 mg/kg i.p. dosage versus 150 mg/kg i.p. dosage in healthy P10 rat ( $n \geq 4$  per timepoint). Graph displays median  $\pm$  95% confidence interval. Group differences were evaluated by Welch's t-test, ns: not significant.
